# Systematic Biology

Volume 65, Number 4 July 2016

## CONTENTS

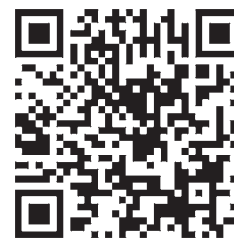

Scan to view this journal  
on your mobile device

### REGULAR ARTICLES

- Two Influential Primate Classifications Logically Aligned  
*Nico M. Franz, Naomi M. Pier, Deeann M. Reeder, Mingmin Chen, Shizhuo Yu, Parisa Kianmajd, Shawn Bowers, and Bertram Ludäscher* ..... 561
- Detecting Hidden Diversification Shifts in Models of Trait-Dependent Speciation and Extinction  
*Jeremy M. Beaulieu and Brian C. O'Meara* ..... 583
- Modeling Character Change Heterogeneity in Phylogenetic Analyses of Morphology through the Use of Priors  
*April M. Wright, Graeme T. Lloyd, and David M. Hillis* ..... 602
- Analysis of a Rapid Evolutionary Radiation Using Ultraconserved Elements: Evidence for a Bias in Some Multispecies Coalescent Methods  
*Kelly A. Meiklejohn, Brant C. Faircloth, Travis C. Glenn, Rebecca T. Kimball, and Edward L. Braun* ..... 612
- Does Gene Tree Discordance Explain the Mismatch between Macroevolutionary Models and Empirical Patterns of Tree Shape and Branching Times?  
*Tanja Stadler, James H. Degnan, and Noah A. Rosenberg* ..... 628
- Comparison of Target-Capture and Restriction-Site Associated DNA Sequencing for Phylogenomics: A Test in Cardinalid Tanagers (Aves, Genus: *Piranga*)  
*Joseph D. Manthey, Luke C. Campillo, Kevin J. Burns, and Robert G. Moyle* ..... 640
- Inferring Bounded Evolution in Phenotypic Characters from Phylogenetic Comparative Data  
*Florian C. Boucher and Vincent Démyer* ..... 651
- Distinct Processes Drive Diversification in Different Clades of Gesneriaceae  
*Eric H. Roalson and Wade R. Roberts* ..... 662
- The Species versus Subspecies Conundrum: Quantitative Delimitation from Integrating Multiple Data Types within a Single Bayesian Approach in Hercules Beetles  
*Jen-Pan Huang and L. Lacey Knowles* ..... 685
- Estimating the Effect of Competition on Trait Evolution Using Maximum Likelihood Inference  
*Jonathan Drury, Julien Clavel, Marc Manceau, and Hélène Morlon* ..... 700
- Gene Tree Discordance Causes Apparent Substitution Rate Variation  
*Fábio K. Mendes and Matthew W. Hahn* ..... 711

### BOOK REVIEWS

- The Biology and Identification of the Coccidia (Apicomplexa) of Marsupials of the World  
*David A. Morrison* ..... 722
- Origins of Biogeography: The Role of Biological Classification in Early Plant and Animal Geography  
*H. Peter Linder* ..... 724

### SOFTWARE FOR SYSTEMATICS AND EVOLUTION

- RevBayes: Bayesian Phylogenetic Inference Using Graphical Models and an Interactive Model-Specification Language  
*Sebastian Höhna, Michael J. Landis, Tracy A. Heath, Bastien Boussau, Nicolas Lartillot, Brian R. Moore, John P. Huelsenbeck and Fredrik Ronquist* ..... 726

**Cover Illustration:** Floral diversity of Gesneriaceae (African violets, gesneriads) overlaid with the current phylogenetic hypothesis of relationships in the family. Species (left to right, top to bottom) are *Cyrtandra samoensis*, *Chrysothemis pulchella*, *Alsobia dianthiflora*, *Drymonia ecuadorensis*, *Columnnea* sp. 'Cordillera del Condor', *Sinningia bulbosa*, *Rhytidophyllum exsertum*, *Aeschynanthus parvifolius*, *Achimenes antirrhina*, *Kohleria* sp. 'Dark Velvet', *Nematanthus fissus*, *Achimenes misera*, *Microchirita* sp., *Gesneria ventricosa*, and *Aeschynanthus guttatus*. All photos by Wade R. Roberts.
